# Supplementary material
Source: publisher figshare collection journal article supplement (https://gsajournals.figshare.com/ndownloader/files/28534140)
Supplement: Supplementary file 1 [file 28534140]

## Sheet: Sheet1
	Genes bound	Genes bound near TSS	Percent genes bound near TSS
CLAMP NC0-10	553	152	0.2749
CLAMP NC11	2077	1992	0.9591
CLAMP NC12	1133	816	0.7202
CLAMP NC13	1837	1501	0.8171
CLAMP NC14	854	648	0.7588
